# Supplementary material for: Efficacy of Acupuncture, Intravenous Lidocaine, and Diet in the Management of Patients with Fibromyalgia: A Systematic Review and Network Meta-Analysis
Source: Healthcare (Basel). 2022 Jun 23;10(7):1176. doi: 10.3390/healthcare10071176 (PMC9320380; doi:10.3390/healthcare10071176)
Supplement: Supplementary file 1 [file healthcare-10-01176-s001.zip]

Archive with 5 entries (5 files):
- Supplementary file 3. Pain (1).xlsx
- Supplementary file 4. Depression (1).xlsx
- Supplementary file 5. Stiffness (1).xlsx
- supplementary material.pdf
- Supplementary file 2. QoL (1).xlsx
