# Supplementary material for: Efficacy of Acupuncture, Intravenous Lidocaine, and Diet in the Management of Patients with Fibromyalgia: A Systematic Review and Network Meta-Analysis
Source: Healthcare (Basel). 2022 Jun 23;10(7):1176. doi: 10.3390/healthcare10071176 (PMC9320380; doi:10.3390/healthcare10071176)
Supplement: Supplementary file 1 [file healthcare-10-01176-s001.zip › Supplementary file 2. QoL (1).xlsx]

## Sheet: QoL
ID	Quality of Life
	Intervention1	Mean	SD	Total	Intervention2	Mean	SD	Total	Intervention3	Mean	SD	Total
Ardila2020	Acupuncture	-0.59	1.07	34	Physiotherapy	-0.44	0.9	36	Sham/Placebo	0.29	0.96	33
Ardila2021	Acupuncture	-6.47	1.13	34	Physiotherapy	-7.11	0.55	36	Sham/Placebo	1.03	2.04	33
Giraldes2016	Lidocaine	-26.5	13.1	21	Sham/Placebo	-37.4	7.6	21
Hadianfard2012	Acupuncture	-4.26	10.01	15	Fluoxetine	-1.1	0.2	15
Harris2005	Acupuncture	-6.34	36.729	30	Sham/Placebo	-3.92	3.917	27
Itoh2010	Acupuncture	-15.2	15.602	7	Sham/Placebo	1.766	12.667	6
Karatay2018	Acupuncture	-30.2	4.03	24	Sham/Placebo	-6.3	1.04	25
Martin2006	Acupuncture	-6.7	1.3	25	Sham/Placebo	-4	2.1	24
Roedler2011	Soy	-8.21	49.07	12	Sham/Placebo	-12.52	76.59	16
Schweiger2020	Acupuncture	-14.8	23.1	34	Nutraceutical	-6.2	4.6	21
Senna2012	Weight reduction	-7.6	8	41	Sham/Placebo	-1.6	2.15	42
Ugurlu2017	Acupuncture	-34.51	0.07	25	Sham/Placebo	-16.81	3.82	25
