# Supplementary material for: Efficacy of Acupuncture, Intravenous Lidocaine, and Diet in the Management of Patients with Fibromyalgia: A Systematic Review and Network Meta-Analysis
Source: Healthcare (Basel). 2022 Jun 23;10(7):1176. doi: 10.3390/healthcare10071176 (PMC9320380; doi:10.3390/healthcare10071176)
Supplement: Supplementary file 1 [file healthcare-10-01176-s001.zip › Supplementary file 3. Pain (1).xlsx]

## Sheet: Pain
ID	Pain
	Intervention1	Mean	SD	Total	Intervention2	Mean	SD	Total	Intervention3	Mean	SD	Total
Ardila2021	Acupuncture	-0.59	0.04	34	Physiotherapy	-0.5	0.3	36	Sham/Placebo	0.03	0.31	34
Cao2020	Acupuncture	-2.13	0.68	30	Cupping	-2.13	0.9	30
Giraldes2016	Lidocaine	-2.2	1.5	21	Sham/Placebo	-4.5	1.6	21
Hadianfard2012	Acupuncture	-1.5	1.19	15	Fluoxetine	-0.75	0.27	15
Harris2005	Acupuncture	-12.25	27.55	30	Sham/Placebo	4.51	21.79	27
Harris2009	Acupuncture	-4	6.72	10	Sham/Placebo	-2.9	8.33	10
Karatay2018	Acupuncture	-3.4	0.01	24	Sham/Placebo	-0.99	0.1	25
Martin2006	Acupuncture	-1.3	0.4	25	Sham/Placebo	-0.9	0.5	24
Martin2019-1	IGUBAC-Diet	-10.12	18.659	8	Sham/Placebo	0.62	13.479	14	Olive tree-based food supplement	-4.3	17.032	9
Mist2017	Acupuncture	-1.9	0.02	16	Sham/Placebo	-0.23	0.22	14
Posner1994	Lidocaine	-5.2	2.7	11	Sham/Placebo	-2.1	2.5	10
Schweiger2020	Acupuncture	-1.9	1.1	34	Nutraceutical	-1.1	1.3	21
Targino2008	Acupuncture	-3	1	34	Sham/Placebo	-0.75	0.75	24
Ugurlu2017	Acupuncture	-5.76	0.01	25	Sham/Placebo	-3.24	0.79	25
Vlainich2010	Lidocaine	-6.3	5.9	15	Sham/Placebo	-6.1	4.75	15
Vlainich2011	Lidocaine	-3.5	1.5	15	Sham/Placebo	-3	0.9	15
Yuksel2019	Acupuncture	-2.02	0.72	21	TENS	-2.33	0.19	21
