# Supplementary material for: Efficacy of Acupuncture, Intravenous Lidocaine, and Diet in the Management of Patients with Fibromyalgia: A Systematic Review and Network Meta-Analysis
Source: Healthcare (Basel). 2022 Jun 23;10(7):1176. doi: 10.3390/healthcare10071176 (PMC9320380; doi:10.3390/healthcare10071176)
Supplement: Supplementary file 1 [file healthcare-10-01176-s001.zip › Supplementary file 4. Depression (1).xlsx]

## Sheet: Mood
ID	Depression
	Intervention1	Mean	SD	Total	Intervention2	Mean	SD	Total	Intervention3	Mean	SD	Total
Ardila2021	Acupuncture	-0.8	0.38	34	Physiotherapy	-1.45	0.21	36	Sham/Placebo	-0.18	0.29	33
Hadianfard	Acupuncture	-0.7	0.4	15	Fluoxetine	-0.4	0	15
Karatay2018	Acupuncture	-24.95	6.57	24	Sham/Placebo	-9.32	0.62	25
Martin2006	Acupuncture	-0.5	0.2	25	Sham/Placebo	-0.6	0	24
Roedler2011	Soy	-1.92	9.76	12	Sham/Placebo	-31.6	-24.84	16
Senna2012	Weight reduction	-5.8	2.9	41	Sham/Placebo	-0.3	1.2	42
Ugurlu2017	Acupuncture	-18.76	1.19	25	Sham/Placebo	-9.68	0.99	25
Vas2016	Acupuncture	-33.9	25.9	78	Sham/Placebo	-18.5	30.1	80
