# Supplementary material for: Efficacy of Acupuncture, Intravenous Lidocaine, and Diet in the Management of Patients with Fibromyalgia: A Systematic Review and Network Meta-Analysis
Source: Healthcare (Basel). 2022 Jun 23;10(7):1176. doi: 10.3390/healthcare10071176 (PMC9320380; doi:10.3390/healthcare10071176)
Supplement: Supplementary file 1 [file healthcare-10-01176-s001.zip › Supplementary file 5. Stiffness (1).xlsx]

## Sheet: Mobility
ID	Stiffness
	Intervention1	Mean	SD	Total	Intervention2	Mean	SD	Total	Intervention3	Mean	SD	Total
Ardila2021	Acupuncture	-0.91	0.16	34	Phyiotherapy	-0.75	0.1	36	Sham/Placebo	0.18	0.08	33
Deluse1992	Acupuncture	-16.97	6.14	28	Sham/Placebo	1.15	12.47	27
Hadianfard2012	Acupuncture	-0.7	0.8	15	Fluoxetine	1.3	0.3	15
Vas2016	Acupuncture	-31	26.1	81	Sham/Placebo	-24.3	26.5	78
