# Supplementary material for: Efficacy of Acupuncture, Intravenous Lidocaine, and Diet in the Management of Patients with Fibromyalgia: A Systematic Review and Network Meta-Analysis
Source: Healthcare (Basel). 2022 Jun 23;10(7):1176. doi: 10.3390/healthcare10071176 (PMC9320380; doi:10.3390/healthcare10071176)
Supplement: Supplementary file 1 [file healthcare-10-01176-s001.zip › supplementary material.pdf]

**Figure S1.** Quality of life (QoL) graph.

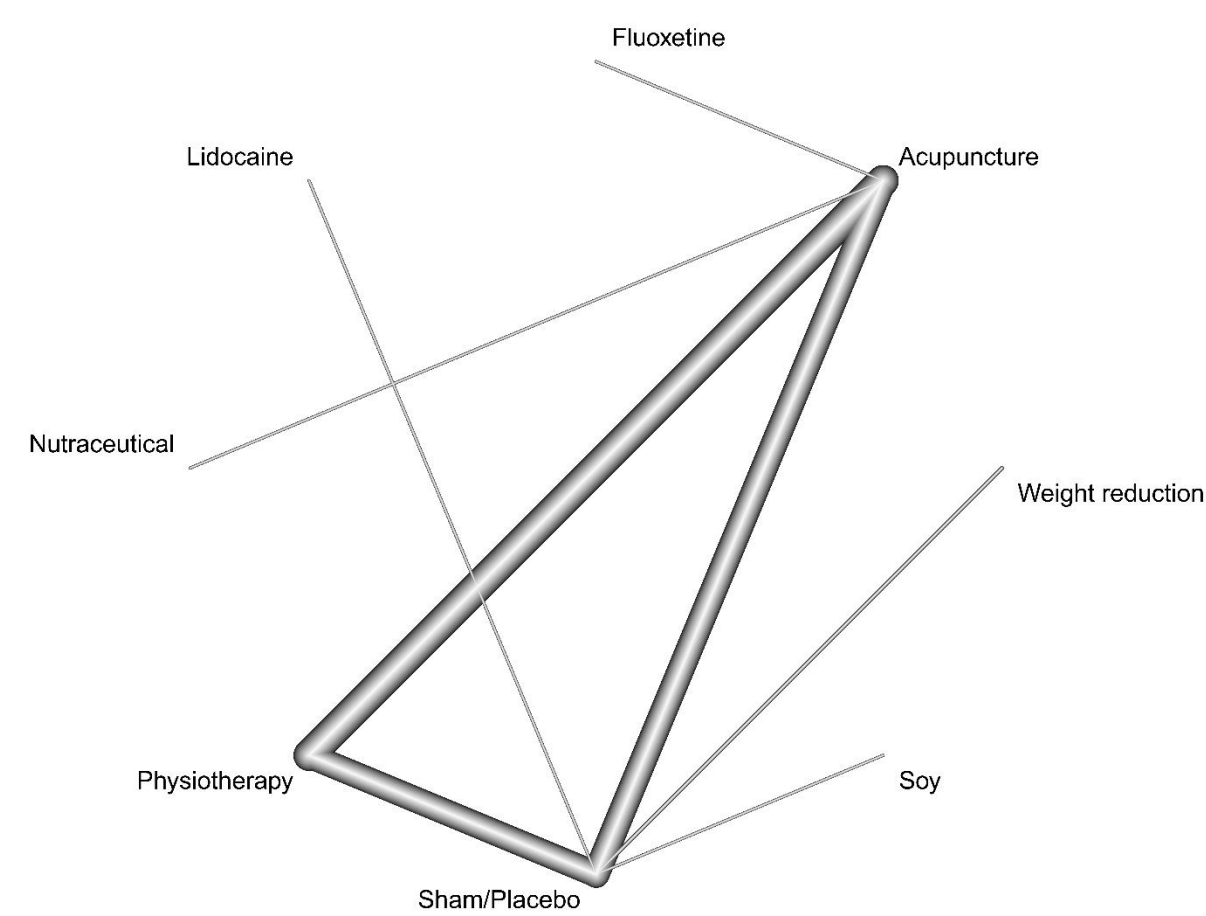

tau-squared = 32.57; I-squared = 99.4%; P < 0.0001

**Table S1.** A network meta-analysis result regarding quality of life (QoL) change.

| Acupuncture               |                           |                           |                           |                          |                          |                          |           |
|---------------------------|---------------------------|---------------------------|---------------------------|--------------------------|--------------------------|--------------------------|-----------|
| -2.80<br>[-10.04; 4.45]   | Physiotherapy             |                           |                           |                          |                          |                          |           |
| -3.16<br>[-15.44; 9.12]   | -0.36<br>[-14.62; 13.89]  | Fluoxetine                |                           |                          |                          |                          |           |
| -4.28<br>[-16.66; 8.11]   | -1.48<br>[-15.04; 12.09]  | -1.12<br>[-18.56; 16.33]  | Weight reduction          |                          |                          |                          |           |
| -8.60<br>[-22.36; 5.16]   | -5.80<br>[-21.35; 9.75]   | -5.44<br>[-23.88; 13.00]  | -4.32<br>[-22.84; 14.19]  | Nutraceutical            |                          |                          |           |
| -14.59<br>[-62.82; 33.64] | -11.79<br>[-60.34; 36.76] | -11.43<br>[-61.20; 38.34] | -10.31<br>[-59.66; 39.04] | -5.99<br>[-56.14; 44.17] | Soy                      |                          |           |
| -10.28<br>[-14.96; -5.59] | -7.48<br>[-14.72; -0.23]  | -7.12<br>[-20.26; 6.03]   | -6.00<br>[-17.47; 5.47]   | -1.68<br>[-16.21; 12.86] | 4.31<br>[-43.69; 52.31]  | Sham/Placebo             |           |
| -21.18<br>[-34.92; -7.43] | -18.38<br>[-33.20; -3.56] | -18.02<br>[-36.45; 0.42]  | -16.90<br>[-34.18; 0.38]  | -12.58<br>[-32.03; 6.87] | -6.59<br>[-56.30; 43.12] | -10.90<br>[-23.83; 2.03] | Lidocaine |

Figure S2. Pain graph.

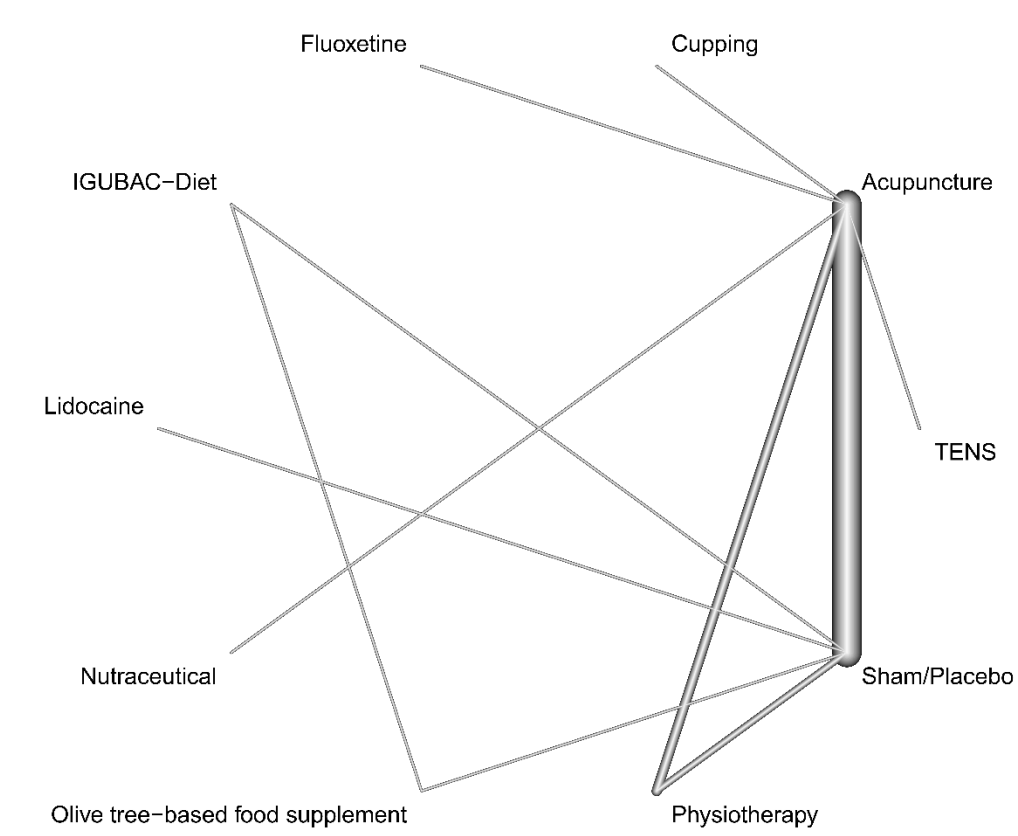

tau-squared = 0.99; I-squared = 99.2%; P < 0.0001

Table S2. A network meta-analysis results regarding pain change.

|                          |                                  |                         |                          |                         |                         |                         |                         |                        |              |
|--------------------------|----------------------------------|-------------------------|--------------------------|-------------------------|-------------------------|-------------------------|-------------------------|------------------------|--------------|
| IGUBAC-Diet              |                                  |                         |                          |                         |                         |                         |                         |                        |              |
| -5.82<br>[-22.99; 11.35] | Olive tree-based food supplement |                         |                          |                         |                         |                         |                         |                        |              |
| -8.74<br>[-23.75; 6.27]  | -2.92<br>[-16.41; 10.57]         | TENS                    |                          |                         |                         |                         |                         |                        |              |
| -9.05<br>[-23.93; 5.83]  | -3.23<br>[-16.58; 10.11]         | -0.31<br>[ -2.28; 1.66] | Acupuncture              |                         |                         |                         |                         |                        |              |
| -9.05<br>[-24.06; 5.96]  | -3.23<br>[-16.72; 10.26]         | -0.31<br>[ -3.11; 2.49] | 0.00<br>[ -1.99; 1.99]   | Cupping                 |                         |                         |                         |                        |              |
| -9.67<br>[-24.63; 5.29]  | -3.85<br>[-17.29; 9.58]          | -0.93<br>[ -3.56; 1.69] | -0.62<br>[ -2.36; 1.11]  | -0.62<br>[ -3.26; 2.02] | Physiotherapy           |                         |                         |                        |              |
| -9.80<br>[-24.82; 5.22]  | -3.98<br>[-17.48; 9.52]          | -1.06<br>[ -3.90; 1.78] | -0.75<br>[ -2.79; 1.29]  | -0.75<br>[ -3.60; 2.10] | -0.13<br>[ -2.81; 2.55] | Fluoxetine              |                         |                        |              |
| -9.85<br>[-24.87; 5.17]  | -4.03<br>[-17.53; 9.47]          | -1.11<br>[ -3.96; 1.74] | -0.80<br>[ -2.86; 1.26]  | -0.80<br>[ -3.66; 2.06] | -0.18<br>[ -2.87; 2.52] | -0.05<br>[ -2.95; 2.85] | Nutraceutical           |                        |              |
| -10.77<br>[-25.69; 4.15] | -4.95<br>[-18.33; 8.43]          | -2.03<br>[ -4.52; 0.46] | -1.72<br>[ -3.23; -0.20] | -1.72<br>[ -4.22; 0.78] | -1.10<br>[ -3.26; 1.07] | -0.97<br>[ -3.51; 1.57] | -0.92<br>[ -3.47; 1.64] | Lidocaine              |              |
| -10.74<br>[-25.60; 4.12] | -4.92<br>[-18.24; 8.40]          | -2.00<br>[ -4.13; 0.13] | -1.69<br>[ -2.48; -0.89] | -1.69<br>[ -3.83; 0.45] | -1.07<br>[ -2.80; 0.67] | -0.94<br>[ -3.13; 1.25] | -0.89<br>[ -3.10; 1.32] | 0.03<br>[ -1.26; 1.32] | Sham/Placebo |

**Figure S3.** Depression graph.

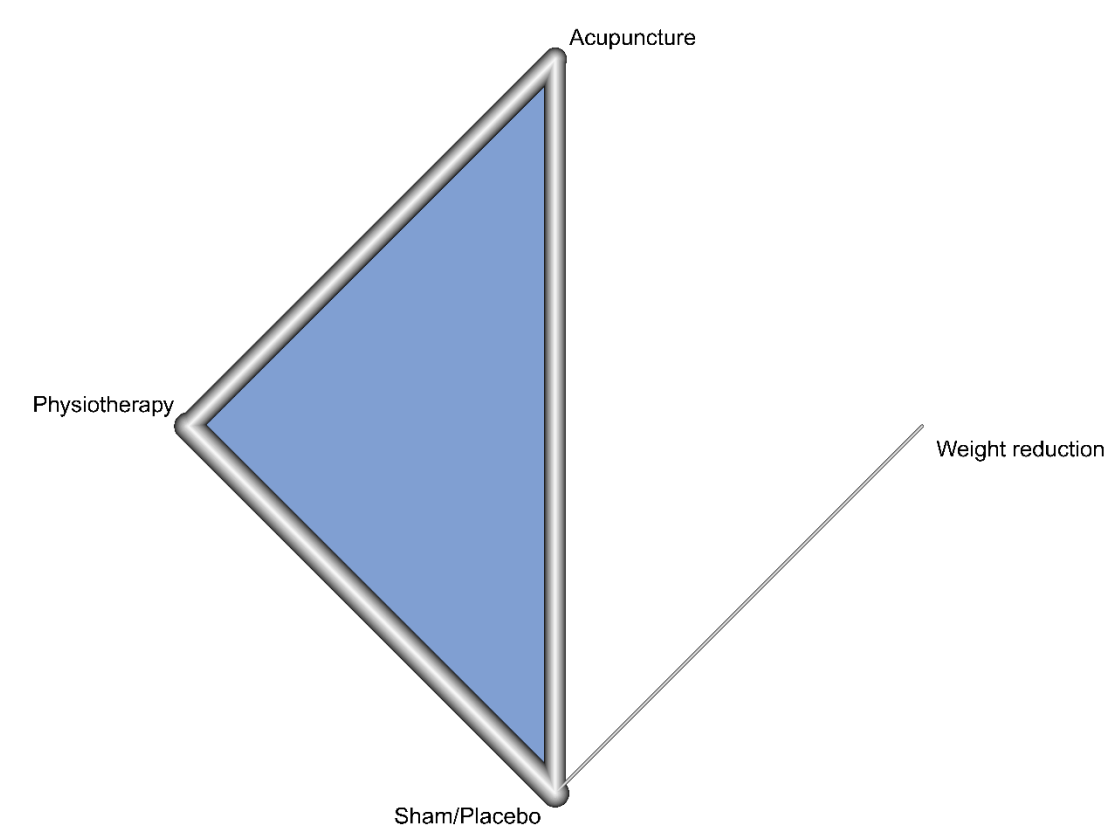

tau-squared = 39.7; I-squared = 99.6%; P = < 0.0001

**Table S3.** A network meta-analysis results regarding depression change.

|                                        |                          |                         |              |
|----------------------------------------|--------------------------|-------------------------|--------------|
| Acupuncture                            |                          |                         |              |
| -3.86<br>[-15.04; 7.32]                | Physiotherapy            |                         |              |
| -4.14<br>[-18.13; 9.85]                | -0.28<br>[-16.97; 16.41] | Weight<br>reduction     |              |
| <b>-9.64</b><br><b>[-16.13; -3.14]</b> | -5.78<br>[-16.96; 5.40]  | -5.50<br>[-17.89; 6.89] | Sham/Placebo |

**Figure S4.** Stiffness graph.

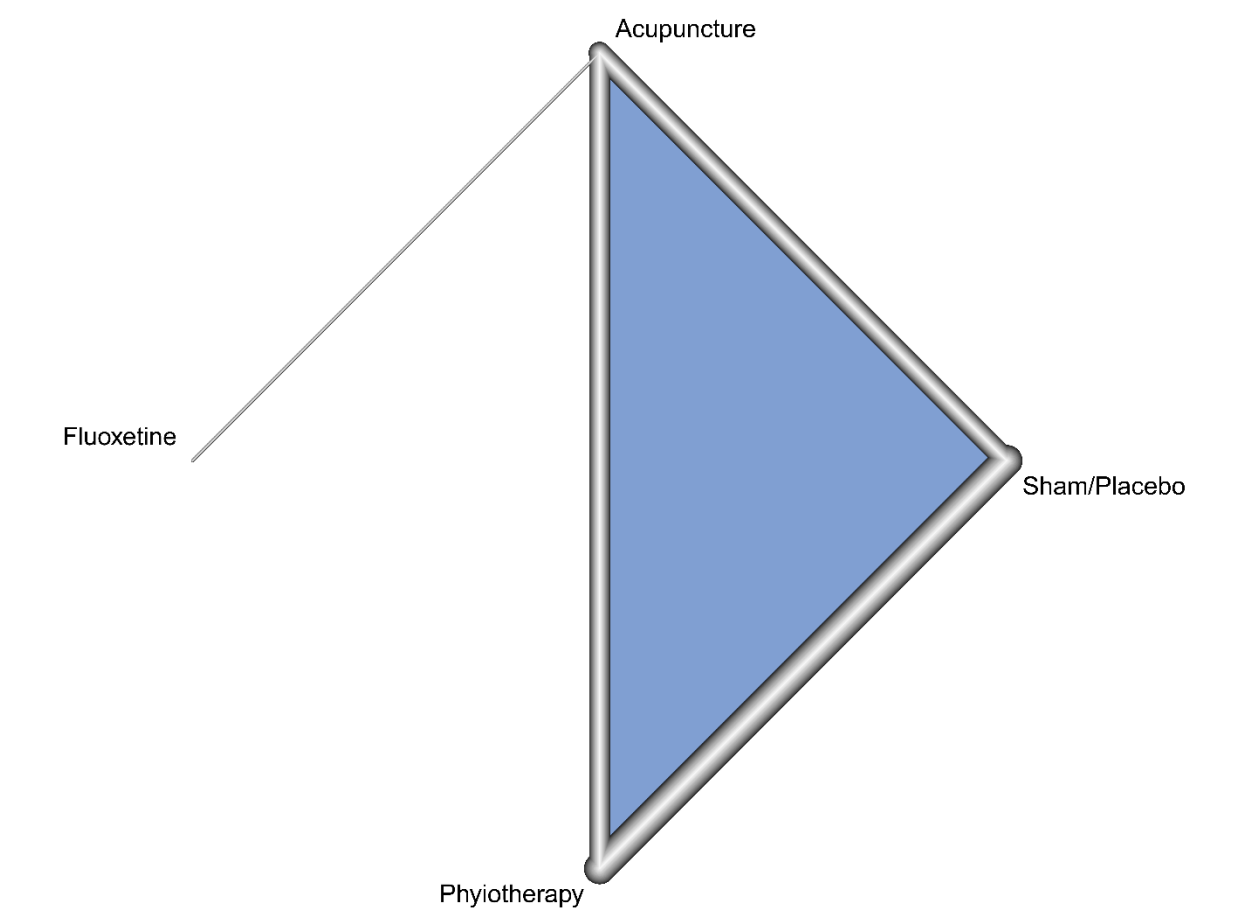

tau-squared = 102.5; I-squared = 95.3%; P < 0.0001

**Table S4.** A network meta-analysis results regarding stiffness change.

| Acupuncture              |                          |                          |              |
|--------------------------|--------------------------|--------------------------|--------------|
| -2.00<br>[-21.85; 17.85] | Fluoxetine               |                          |              |
| -3.87<br>[-22.06; 14.31] | -1.87<br>[-28.79; 25.04] | Physiotherapy            |              |
| -8.52<br>[-20.40; 3.36]  | -6.52<br>[-29.65; 16.61] | -4.64<br>[-22.83; 13.54] | Sham/Placebo |
